# Supplementary material
Source: MDPI journal article supplement (https://www.mdpi.com/2073-4344/12/5/543)
Supplement: s1 [file s1]

## Hydrogen Pressure as a Key Parameter to Control the Quality of the Naphtha Produced in the Hydrocracking of an HDPE/VGO Blend

Francisco J. Vela <sup>1</sup>, Roberto Palos <sup>1,2</sup>, Javier Bilbao <sup>1</sup>, José M. Arandes <sup>1</sup>,

Alazne Gutiérrez <sup>1</sup> \*

<sup>1</sup> *Department of Chemical Engineering, University of the Basque Country UPV/EHU, PO Box 644, 48080 Bilbao, Spain*

<sup>2</sup> *Department of Chemical and Environmental Engineering, University of the Basque Country UPV/EHU, Plaza Ingeniero Torres Quevedo 1, 48013 Bilbao, Spain*

(\*) corresponding author: alazne.gutierrez@ehu.eus

### A. HYDROCRACKING UNIT

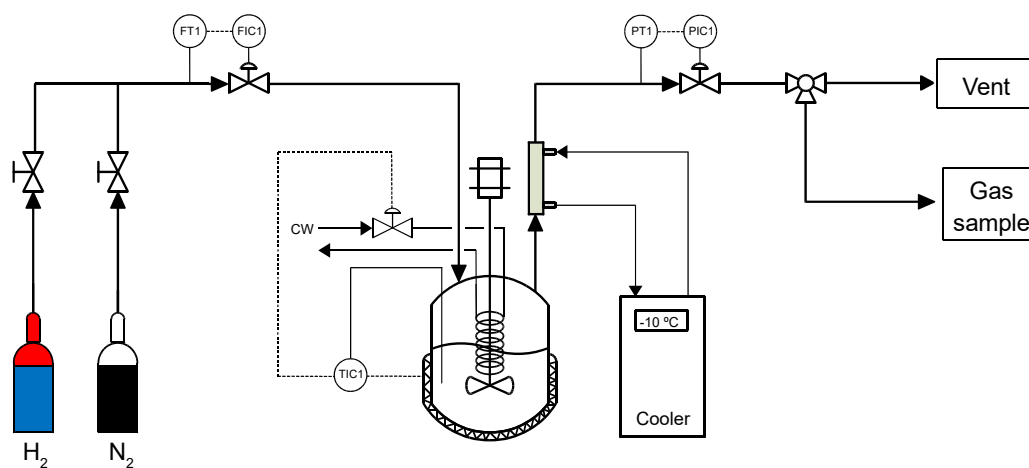

**Figure S1.** Schematic representation of the hydrocracking unit.

**B. SOLVENT FRACTIONATION METHOD**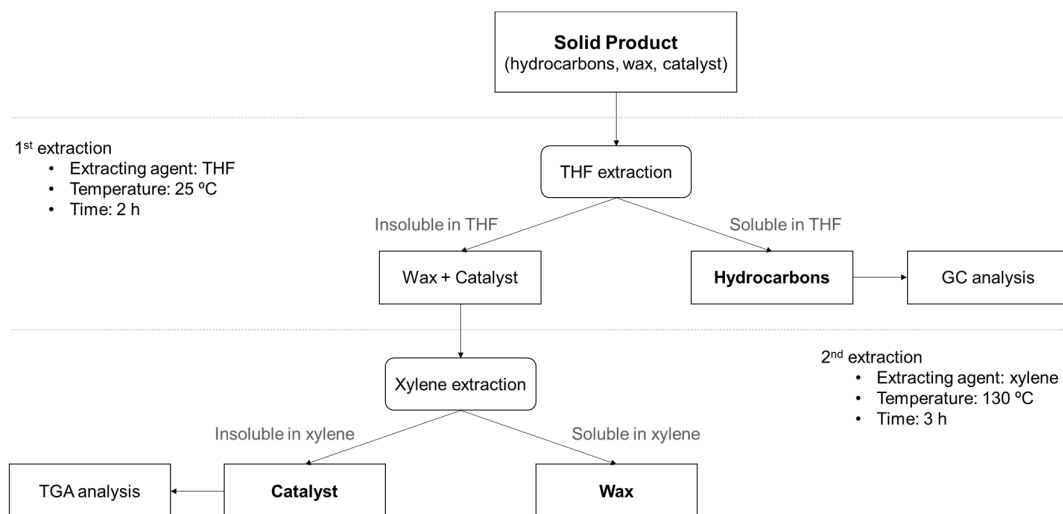**Figure S2.** Solvent fractionation method followed.

### C. CHARACTERIZATION OF THE FEEDS

**Table S1.** Properties of vacuum gas oil (VGO) and high-density polyethylene (HDPE).

| Properties                                      | VGO     | HDPE   |
|-------------------------------------------------|---------|--------|
| Physical properties                             |         |        |
| Density at 15 °C (kg L <sup>-1</sup> )          | 0.89    | 0.94   |
| Viscosity at 37.8 °C (cSt)                      | 34.2    | —      |
| Average molecular weight (g mol <sup>-1</sup> ) | 377     | 46,200 |
| Dispersity                                      | —       | 2.89   |
| Higher heating value (MJ kg <sup>-1</sup> )     | 45      | 43     |
| Simulated distillation (°C)                     |         |        |
| IBP-FBP                                         | 156-519 | —      |
| T <sub>50</sub> -T <sub>95</sub>                | 415-491 | —      |
| Distillation fractions (wt%)                    |         |        |
| Naphtha (< 216 °C)                              | 0.17    | —      |
| LCO (215-350 °C)                                | 4.48    | —      |
| HCO (> 350 °C)                                  | 95.4    | —      |
| Elemental analysis (wt%)                        |         |        |
| C                                               | 87.3    | 85.7   |
| H                                               | 12.5    | 14.3   |
| N                                               | —       | —      |
| S (ppm)                                         | 510     | —      |
| Composition (wt%)                               |         |        |
| Paraffins                                       | 14.0    | —      |
| Naphthenes                                      | 35.3    | —      |
| Mono-aromatics                                  | 20.3    | —      |
| Di-aromatics                                    | 12.4    | —      |
| Poly-aromatics                                  | 15.7    | —      |
| Sulfur-containing compounds                     | 2.3     | —      |
